# Supplementary material for: Promising Terpenes as Natural Antagonists of Cancer: An In-Silico Approach
Source: PubMed Central journal article supplement (PMC6983034; doi:10.3390/molecules25010155), 2019-12-30
Supplement: molecules-25-00155-s001.pdf [file molecules-25-00155-s001.pdf]

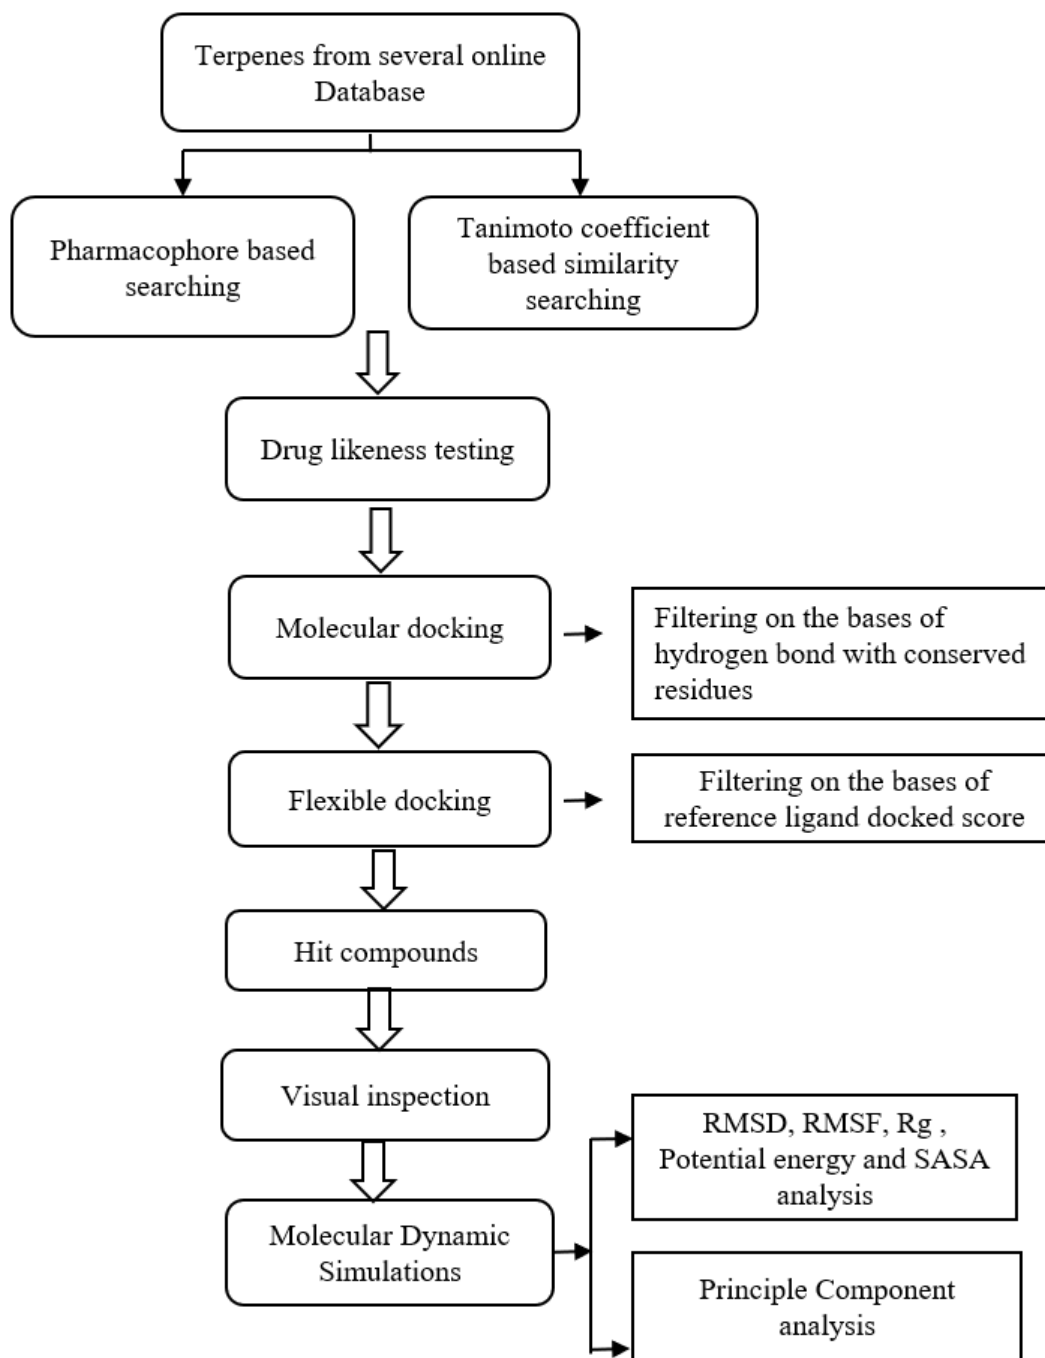

**Supplementary figure 1.** A schematic flow chart of methodology used in this study.

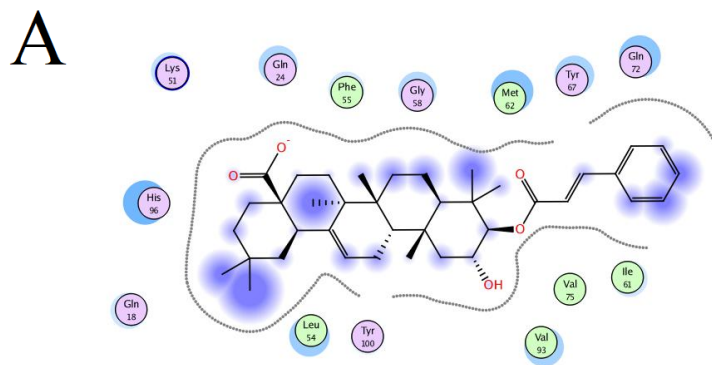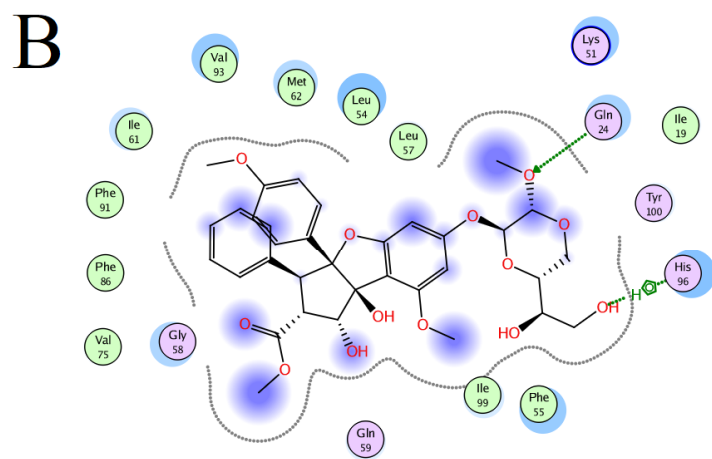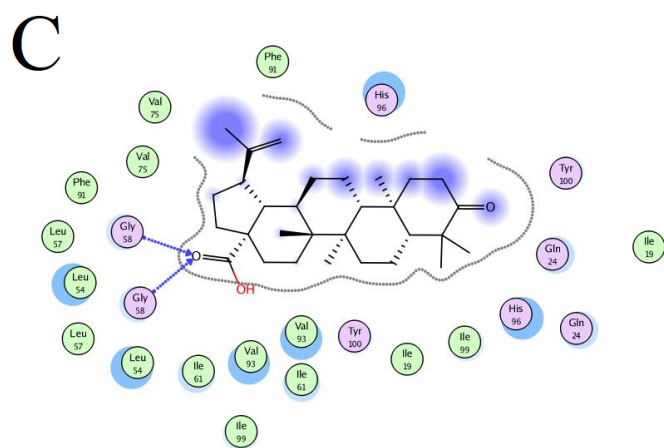

**Supplementary figure 2.** 2D Binding interactions of terpenes with active site residues of MDM2-P53 (A) 3-trans-p-coumaroyl maslinic acid, (B) Silvestrol and (C) Betulonic acid

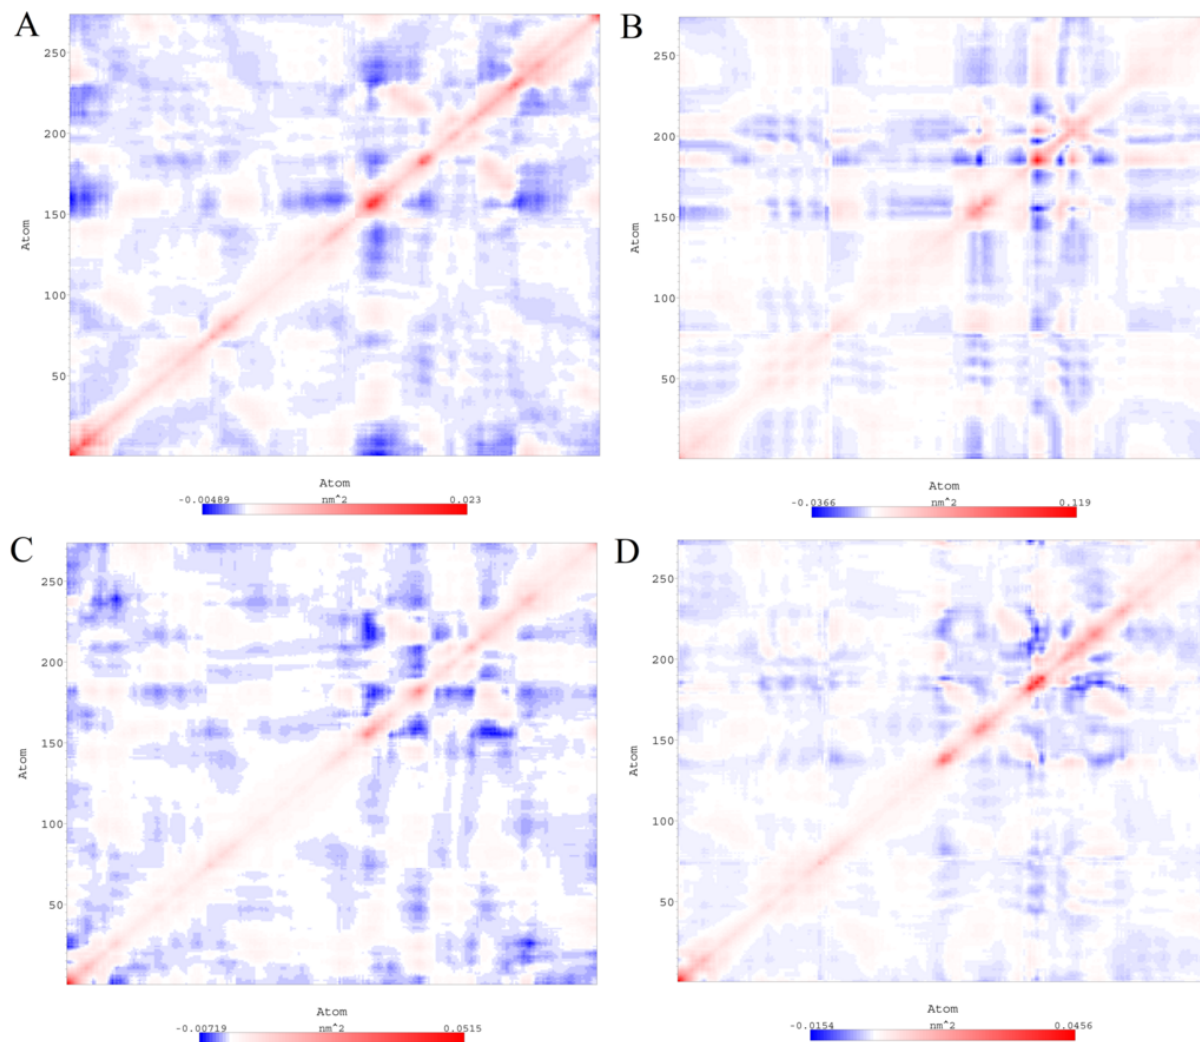

**Supplementary figure 3.** Covariance matrices of all the complexes during 20 ns Simulations: (A) Reference, (B) 3-trans-p-coumaroyl maslinic acid, (C) Silvestrol and (D) Betulonic acid
